# Supplementary material for: Conformational and Cs+complexation properties of norbadione-A: a molecular modeling study
Source: Royal Society of Chemistry journal article supplement (doi:10.1039/b712836c), 2007-10-22
Supplement: b712836c.pdf [file b712836c.pdf]

|                                               | Pulv2 <sup>0</sup> | Pulv2 <sup>-1</sup> <sub>COOH</sub> | Pulv2 <sup>-1</sup> <sub>enol</sub> | Pulv2 <sup>-2</sup> | Pulv3 <sup>0</sup> | Pulv3 <sup>-1</sup> |
|-----------------------------------------------|--------------------|-------------------------------------|-------------------------------------|---------------------|--------------------|---------------------|
| HF/6-31G(d)//HF/6-31G(d)                      |                    |                                     |                                     |                     |                    |                     |
| E <sub>tot</sub> (Z)                          | -1290.7009         | -1290.1836                          | -1290.1454                          | -1289.5147          | -1329.7255         | -1329.2061          |
| E <sub>tot</sub> (E)                          | -1290.7123         | -1290.1937                          | -1290.1797                          | -1289.5125          | -1329.7397         | -1329.2119          |
| ΔE <sub>tot</sub> (Z-E)                       | 7.2                | 6.3                                 | 21.5                                | -1.4                | 8.9                | 3.6                 |
| HF/6-31G(d,p)//HF/6-31G(d)                    |                    |                                     |                                     |                     |                    |                     |
| E <sub>tot</sub> (Z)                          | -1290.7382         | -1290.2155                          | -1290.1773                          | -1289.5400          | -1329.7609         | -1329.2350          |
| E <sub>tot</sub> (E)                          | -1290.7499         | -1290.2262                          | -1290.2162                          | -1289.5379          | -1329.7754         | -1329.2407          |
| ΔE <sub>tot</sub> (Z-E)                       | 7.3                | 6.7                                 | 24.4                                | -1.3                | 9.1                | 3.6                 |
| δ (H <sub>8a</sub> / H <sub>8b</sub> ) Z      | 7.9 / 7.7          | 7.6 / 7.5                           | 9.3 / 7.7                           | 9.1 / 8.3           | 7.8 / 7.6          | 8.3 / 8.2           |
| δ (H <sub>8a</sub> / H <sub>8b</sub> ) E      | 7.6 / 7.7          | 7.6 / 7.6                           | 8.6 / 7.6                           | 9.2 / 8.3           | 7.4 / 7.5          | 8.2 / 8.4           |
| < δ > Z <sup>a)</sup>                         | 7.8                | 7.6                                 | 8.5                                 | 8.7                 | 7.7                | 8.2                 |
| < δ > E <sup>a)</sup>                         | 7.7                | 7.6                                 | 8.1                                 | 8.7                 | 7.4                | 8.3                 |
| B3LYP/6-311G <sup>++</sup> (d,p)//HF/6-31G(d) |                    |                                     |                                     |                     |                    |                     |
| E <sub>tot</sub> (Z)                          | -1298.6649         | -1298.1656                          | -1298.1354                          | -1297.5192          | -1337.9683         | -1337.4638          |
| E <sub>tot</sub> (E)                          | -1298.6798         | -1298.1768                          | -1298.1635                          | -1297.5160          | -1337.9861         | -1337.4692          |
| ΔE <sub>tot</sub> (Z-E)                       | 9.3                | 7.0                                 | 17.6                                | -2.0                | 11.2               | 3.4                 |

**Table S1 :** Total energies (E<sub>tot</sub>, in Hartree) and relative (ΔE<sub>tot</sub>, in kcal/mol) QM energies, and δ (<sup>1</sup>H) NMR chemical shift (in ppm) of the H<sub>8</sub> protons of the different Pulv2 and Pulv3 species. Comparison of HF/6-31G(d)//HF/6-31G(d), HF/6-31G(d,p)//HF/6-31G(d) and DFT-B3LYP/6-311G<sup>++</sup>(d,p) // HF/6-31G(d) results.

a) Mean value of the chemical shifts of the two ortho protons.

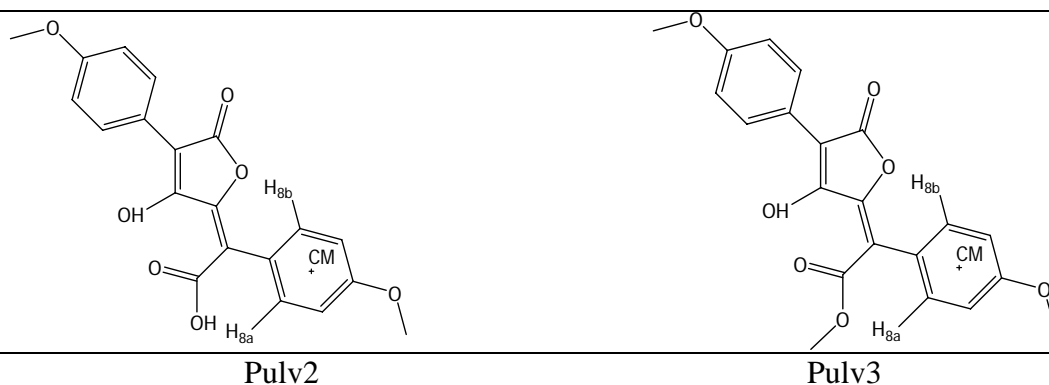

|                                 | $E_{\text{tot}}(\text{E/E})$ |                          | $E_{\text{tot}}(\text{Z/Z})$ |                   | $\Delta E_{\text{tot}}(\text{E/E-Z/Z})$ |                   |                    |                   |
|---------------------------------|------------------------------|--------------------------|------------------------------|-------------------|-----------------------------------------|-------------------|--------------------|-------------------|
|                                 | HF<br>6-31G(d)               | B3LYP<br>6-31G(d)        | HF<br>6-31G(d)               | B3LYP<br>6-31G(d) | HF<br>6-31G(d)                          | B3LYP<br>6-31G(d) | AMBER<br>gas phase | AMBER<br>methanol |
| $\text{NBA}^{2-}_{\text{COOH}}$ | -2457.7744                   | -2471.8703               | -2457.7598                   | -2471.8546        | -9.2                                    | -9.8              | -11                | -5                |
| $\text{NBA}^{2-}_{\text{enol}}$ | -2457.7552                   | -2471.8703 <sup>a)</sup> | -2457.7001                   | -2471.7981        | -34.6 <sup>a)</sup>                     | -45.3             | -20                | -31               |
| $\text{NBA}^{4-}$               | -2456.2664                   | -2470.3620               | -2456.2626                   | -2470.3547        | -2.6                                    | -4.6              | -16                | -8                |

**Table S2:** Total ( $E_{\text{tot}}$ , in hartree) and relative ( $\Delta E_{\text{tot}}$ , in kcal/mol) QM and MM energies of the  $\text{NBA}^{2-}$  and  $\text{NBA}^{4-}$ .

a) Upon B3LYP/6-31G(d) optimisation of the  $\text{NBA}^{2-}_{\text{enol}}$ , the OH proton spontaneously transferred to the  $\text{CO}_2^-$  group forming  $\text{NBA}^{2-}_{\text{COOH}}$ .

Therefore the  $\Delta E$  (E/E – Z/Z) DFT energy corresponds to different protonic state.

|                                 |     | $\text{Cs}_1 \cdots \text{O}_{\text{NBA}}$ | $\text{Cs}_1 \cdots \text{O}_{\text{MeOH}}$ | $\text{Cs}_2 \cdots \text{O}_{\text{NBA}}$ | $\text{Cs}_2 \cdots \text{O}_{\text{MeOH}}$ |
|---------------------------------|-----|--------------------------------------------|---------------------------------------------|--------------------------------------------|---------------------------------------------|
| $\text{NBA}^{2-}_{\text{COOH}}$ | Z/Z | 0.0                                        | 6.3                                         | 2.1                                        | 4.5                                         |
|                                 | E/E | 2.0                                        | 4.9                                         | 0.0                                        | 6.3                                         |
| $\text{NBA}^{2-}_{\text{enol}}$ | Z/Z | 0.9                                        | 6.0                                         | 0.0                                        | 6.2                                         |
|                                 | E/E | 0.0                                        | 5.9                                         | 1.3                                        | 5.0                                         |
| $\text{NBA}^{4-}$               | Z/Z | 2.7                                        | 5.6                                         | 2.8                                        | 5.8                                         |
|                                 | Z/E | 3.2                                        | 5.3                                         | 3.2                                        | 5.6                                         |
|                                 | E/Z | 3.0                                        | 6.0                                         | 3.4                                        | 5.5                                         |
|                                 | E/E | 1.9                                        | 6.2                                         | 4.4                                        | 4.8                                         |

Table S3 :  $\text{NBA}^{2-} \text{2Cs}^+$  and  $\text{NBA}^{4-} \text{2Cs}^+$  complexes simulated in methanol. Average coordination number of the  $\text{Cs}^+$  cations obtained by integration of the Radial Distribution Functions (RDF's) of  $\text{O}_{\text{NBA}}$  and  $\text{O}_{\text{MeOH}}$  oxygens up to 4 Å. Averages during the last 200 ps of dynamics.

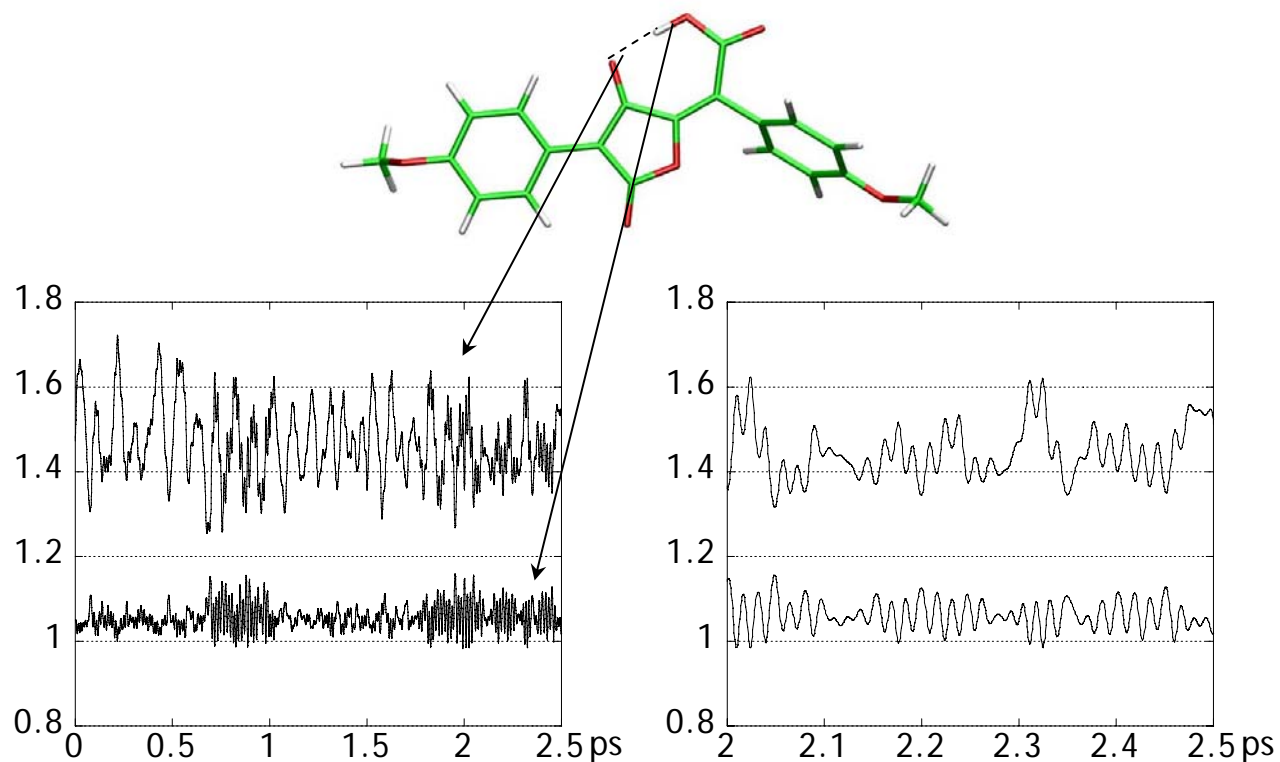

**Figure S1** : CP-MD simulation on the  $\text{Pulv}^{-1} \text{E}_{\text{COOH}}$  species.  $\text{H}_{\text{COOH}} \dots \text{O}_{\text{enolate}}$  and  $(\text{CO})\text{O}-\text{H}$  distances (in Å) as a function of time (after 1 ps of equilibration; not shown).

| PulvMe <sub>COOH</sub>                                                                                                                         | PulvMe <sub>OH</sub>                                                                                                                          |
|------------------------------------------------------------------------------------------------------------------------------------------------|-----------------------------------------------------------------------------------------------------------------------------------------------|
| 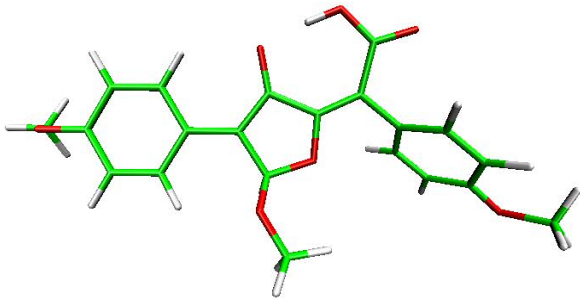                                                              |                                                             |
| $E_{\text{tot}} = -1330.3391$ Hartree<br>$\Delta E_{\text{tot}} = 0.0$ kcal/mol<br>$d(\text{H-bond}) = 1.535$ Å<br>$d(\text{COO-H}) = 0.986$ Å | $E_{\text{tot}} = -1330.3321$ Hartree<br>$\Delta E_{\text{tot}} = 4.4$ kcal/mol<br>$d(\text{H-bond}) = 1.412$ Å<br>$d(\text{CO-H}) = 1.023$ Å |

**Figure S2 :** Optimized structures and energies of the COOH and enol(OH) forms of the methylated PulvMe analogue of the Pulv2 pulvinic acid.

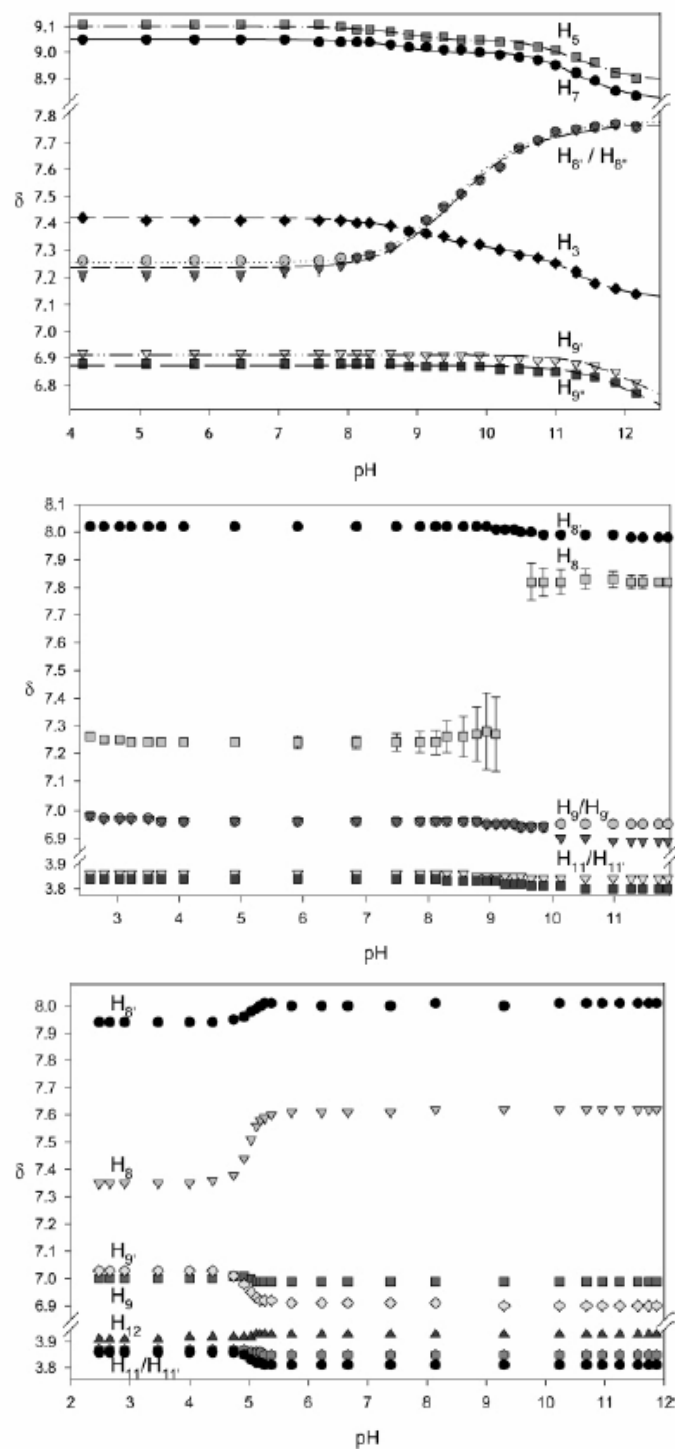

**Figure S3** : Experimental chemical shifts  $\delta$  from  $^1H$  NMR titrations as a function of pH at 25°C ( $CD_3OD:D_2O-80:20$ ) for the NBA (top), Pulv2 (middle) and Pulv3 (bottom) species (from Kuad et al, *J. Am. Chem. Soc.*, **2005**, *127*, 1323-1333). See Figure 2 for the proton labels.

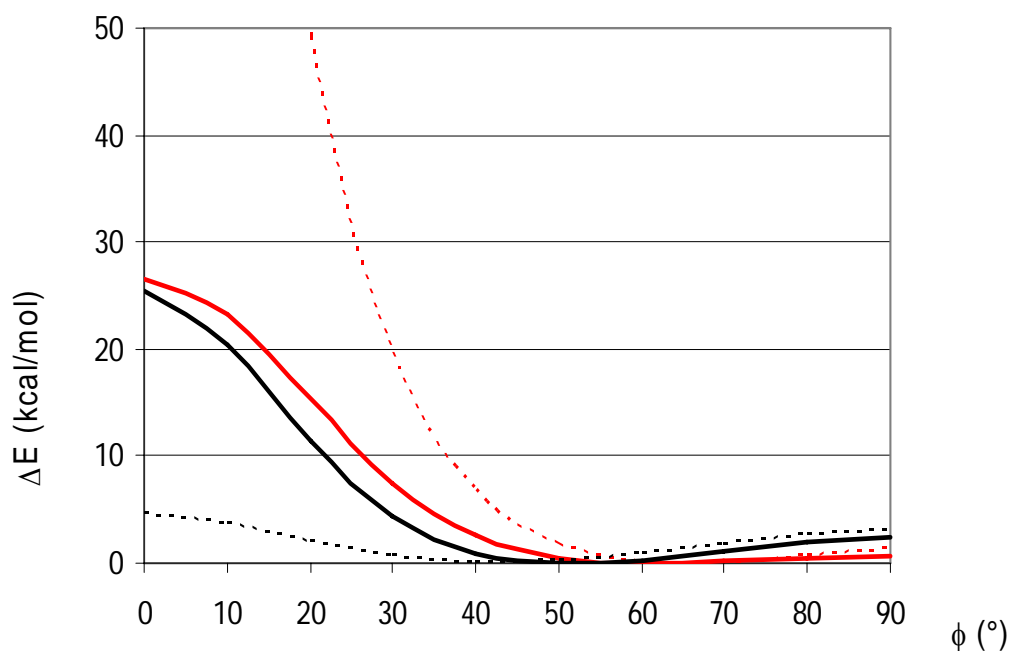

**Figure S4 :** Relative energies of the Pulv2<sup>-1</sup> et Pulv2<sup>-2</sup> (HF/6-31G(d) calculations) as a function of the  $\phi$  angle. Calculated by stepwise rotating the  $\phi$  angle (from 0 to 180° by increments of 30°), and optimizing all other degrees of freedom.

Plain red curve : Pulv2<sup>-1</sup><sub>COOH</sub>(E), dotted red : Pulv2<sup>-1</sup><sub>COOH</sub>(Z), plain black : Pulv2<sup>-2</sup>(Z), dotted black : Pulv2<sup>-2</sup>(E).

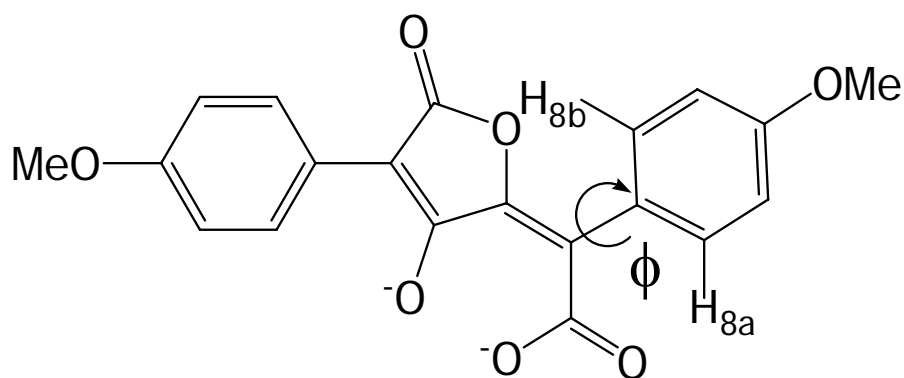

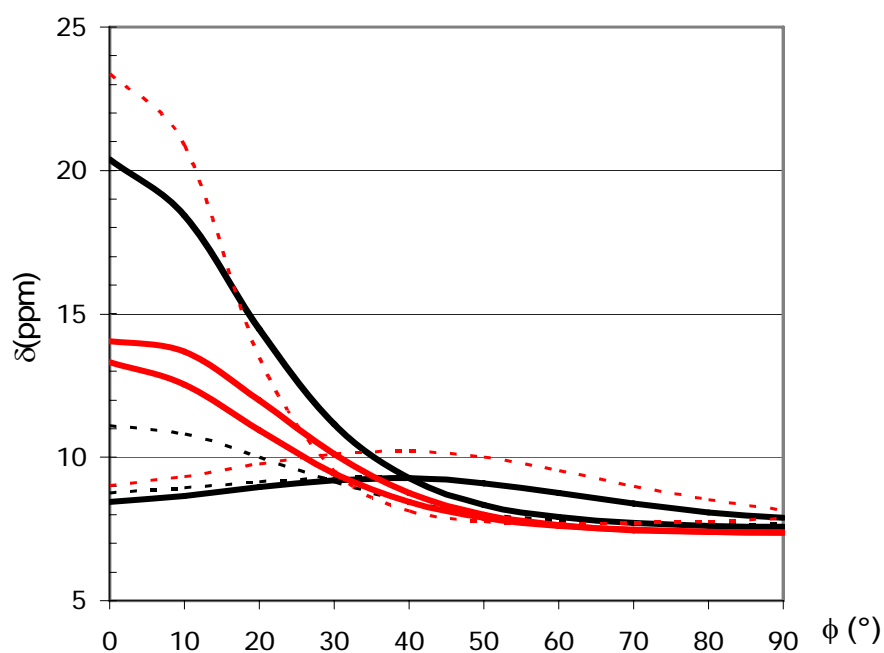

**Figure S5** : NMR shifts of the H<sub>8</sub> protons of the Pulv2 species (HF/6-31G(d,p)// HF/6-31G(d) calculations) calculated as a function of the  $\phi$  angle.

Plain red curves : Pulv2<sup>-1</sup><sub>COOH</sub>(E), dotted red : Pulv2<sup>-1</sup><sub>COOH</sub>(Z), plain black : Pulv2<sup>-2</sup>(Z), dotted black : Pulv2<sup>-2</sup>(E).

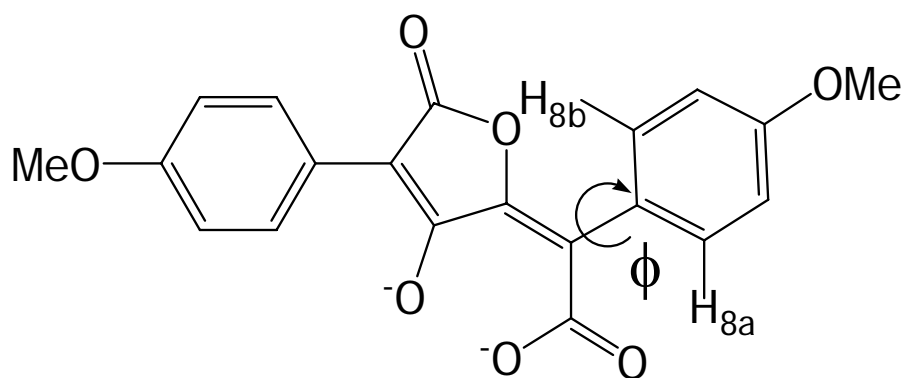



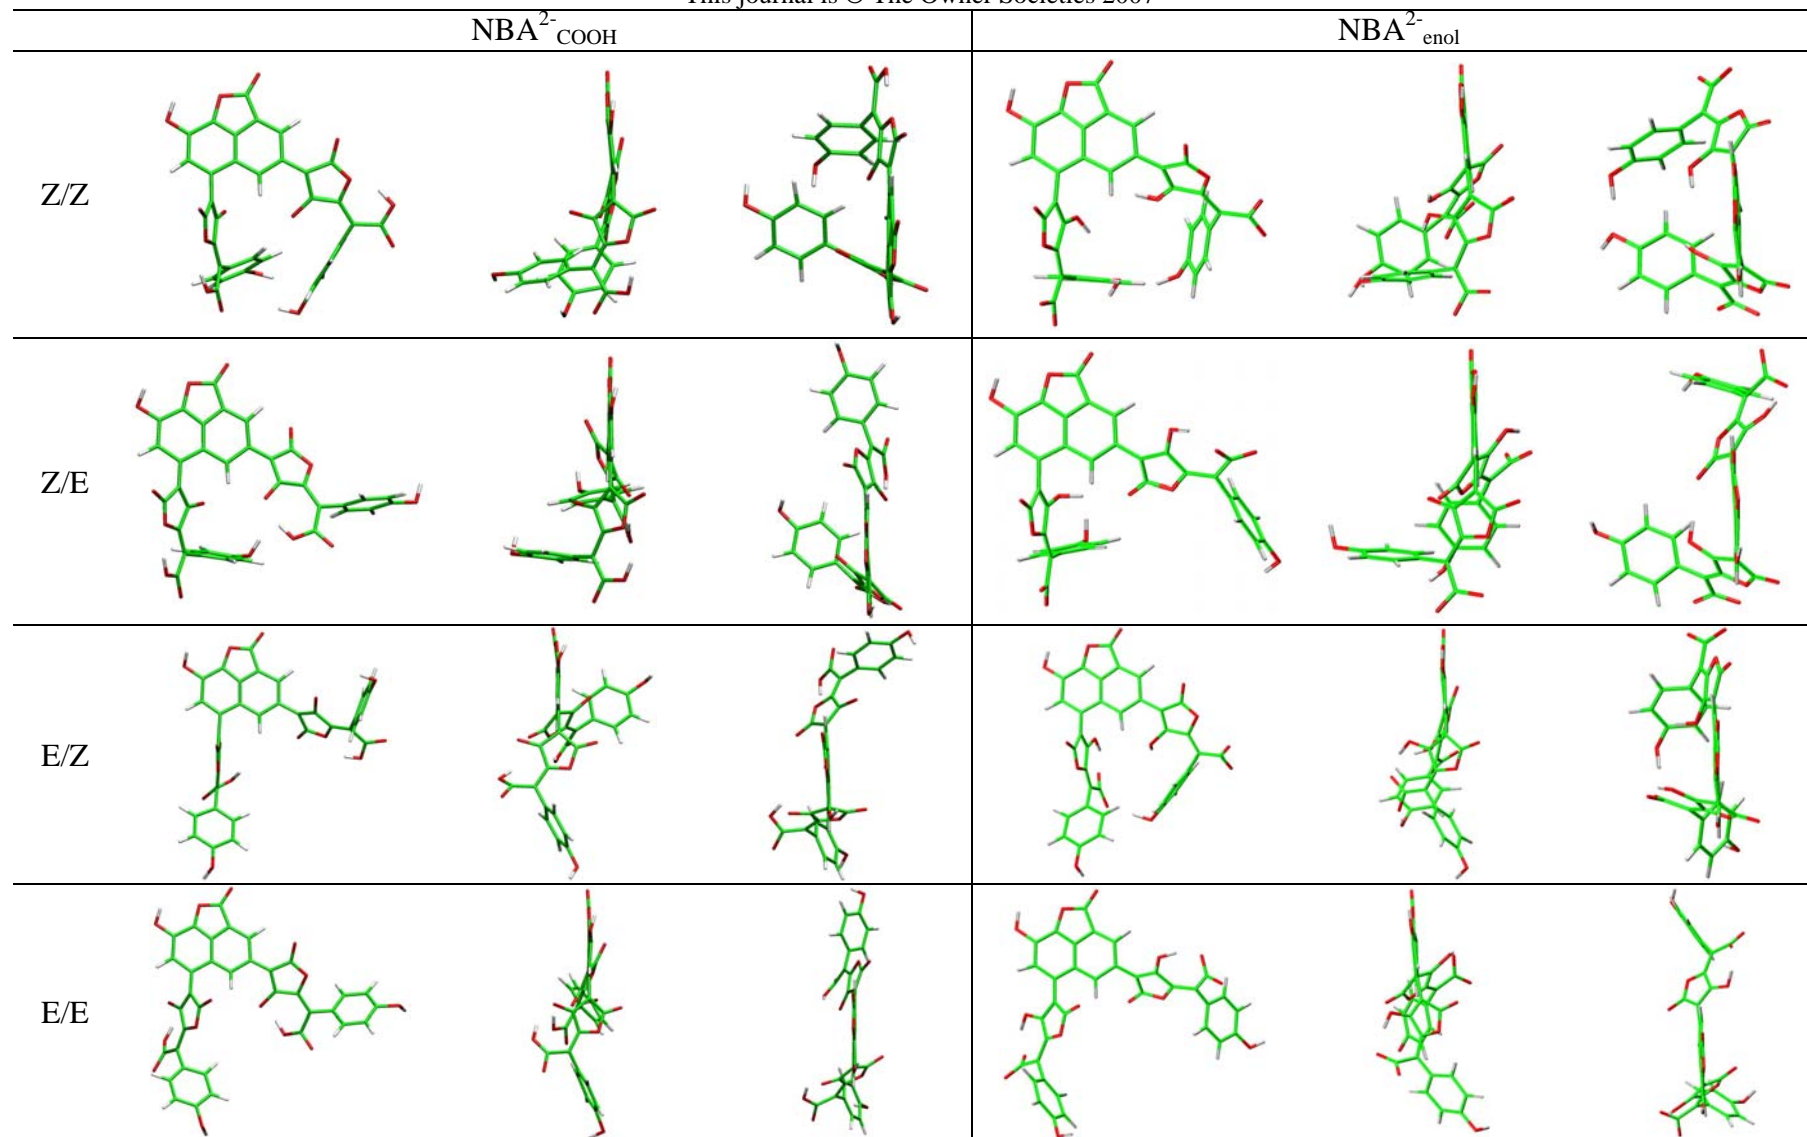

Figure S6 : Final snapshots of the Z/Z, Z/E, E/Z and E/E isomers of  $\text{NBA}^{2-}_{\text{COOH}}$  and  $\text{NBA}^{2-}_{\text{enol}}$  simulated by MD in the gas phase. Orthogonal views (left and middle) and top views (right).

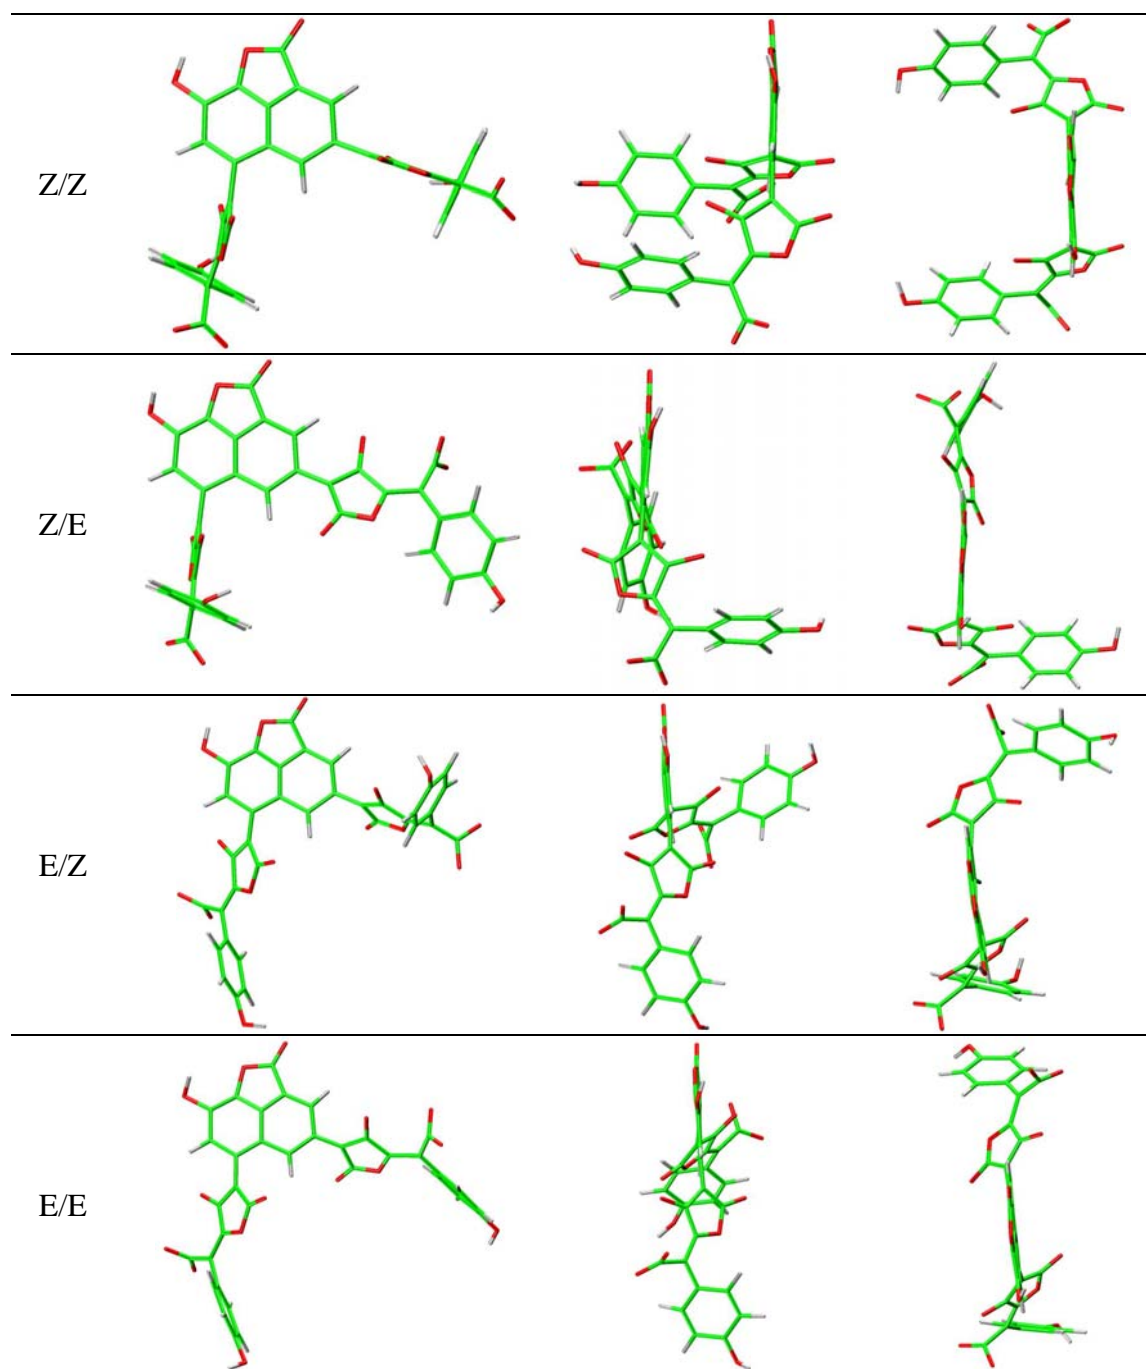

Figure S7 : Final snapshots of the Z/Z, Z/E, E/Z and E/E isomers of the  $\text{NBA}^{4+}$  molecule simulated by MD in the gas phase. Orthogonal (left and middle) and top views (right).

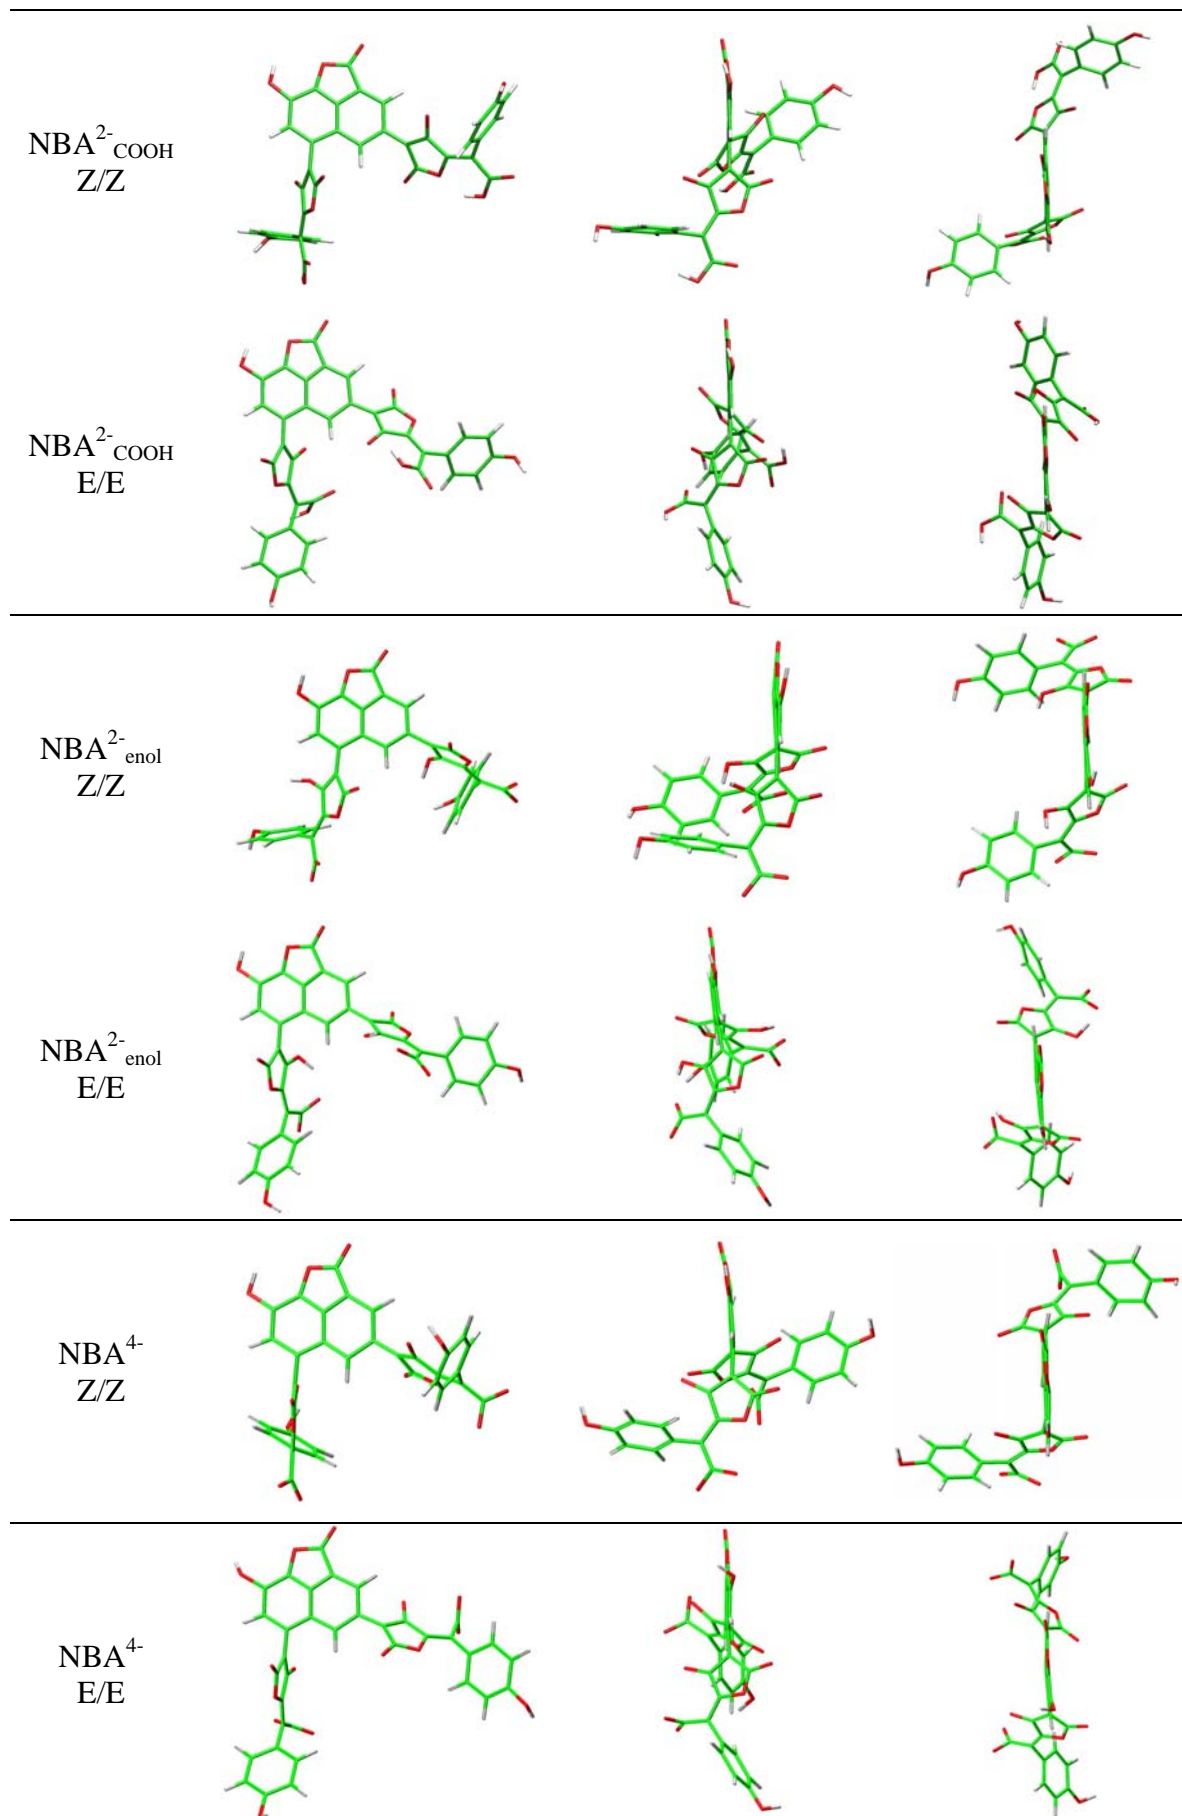

Figure S8 : Final snapshots of NBA<sup>2-</sup><sub>enol</sub>, NBA<sup>2-</sup><sub>COOH</sub> and NBA<sup>4-</sup> with the Z/Z and E/E isomers of the norbadione in methanol. Orthogonal (left and middle) and top views (right).

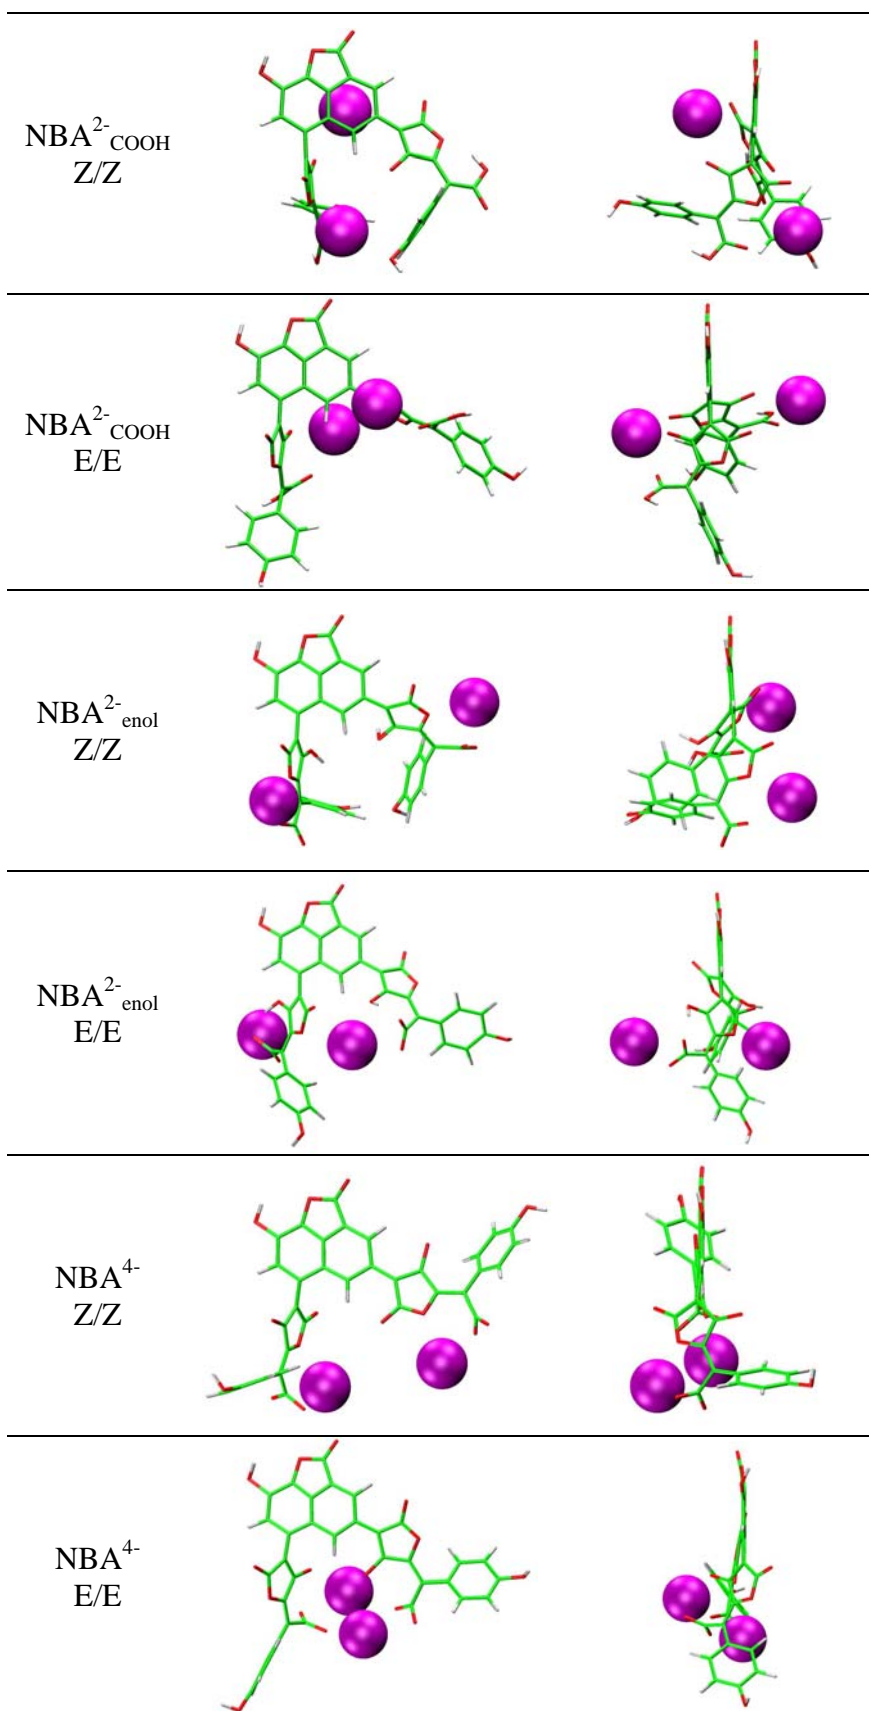

**Figure S9** : Final snapshots of the NBA<sup>2-</sup><sub>COOH</sub> 2Cs<sup>+</sup> and NBA<sup>2-</sup><sub>enol</sub>2Cs<sup>+</sup> and NBA<sup>4-</sup>2Cs<sup>+</sup> complexes with the Z/Z and E/E isomers of the norbadione simulated by MD in the gas phase. Orthogonal views.
